# Supplementary material for: Oxidative, Genotoxic and Cytotoxic Damage Potential of Novel Borenium and Borinium Compounds
Source: MDPI journal article supplement (doi:10.3390/inorganics11080324), 2023-07-31
Supplement: s1 [file s1]

## Supplementary Figures

### Spectra Data of Borenium and Borinium Compounds

**Borenium 1:**  $^1\text{H}$  NMR (600 MHz,  $\text{CDCl}_3$ ):  $\delta$  8.05 (d,  $J=5.5$  Hz, 2H; CH aromatic pyridin), 6.74 (d,  $J=5.3$  Hz, 2H; CH aromatic pyridin), 4.86 (m, 2H; CH connect to bor), 3.09 (s, 3H;  $\text{CH}_3$  connect to nitrogen), 3.05 (s, 3H;  $\text{CH}_3$  connect to nitrogen), 1.90-1.53 (m, 20H;  $\text{CH}_2$  aliphatic).  $^{13}\text{C}$  NMR (150 MHz,  $\text{CDCl}_3$ ): 178.5, 155.8, 144.4, 142.1, 129.1, 128.4, 126.5, 106.5, 106.3, 69.4, 38.1, 34.8, 27.7, 27.2. IR (cm): 3341 (C-H aromatic), 2932 (C-H aliphatic), 2856 (C-H aliphatic), 1654 (C=O), 1402 (C=C aromatic), 1025 (C-C aliphatic).

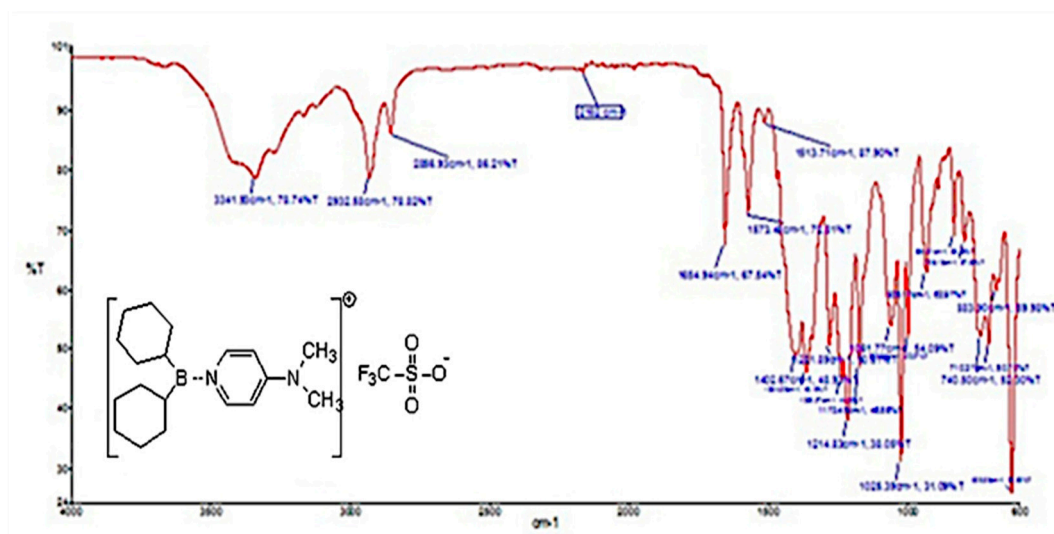

**Figure S1.** IR spectrum of dicyclohexyl borenium dimethyl amino pyridine trifluoro methane sulphonate (Borenium 1)

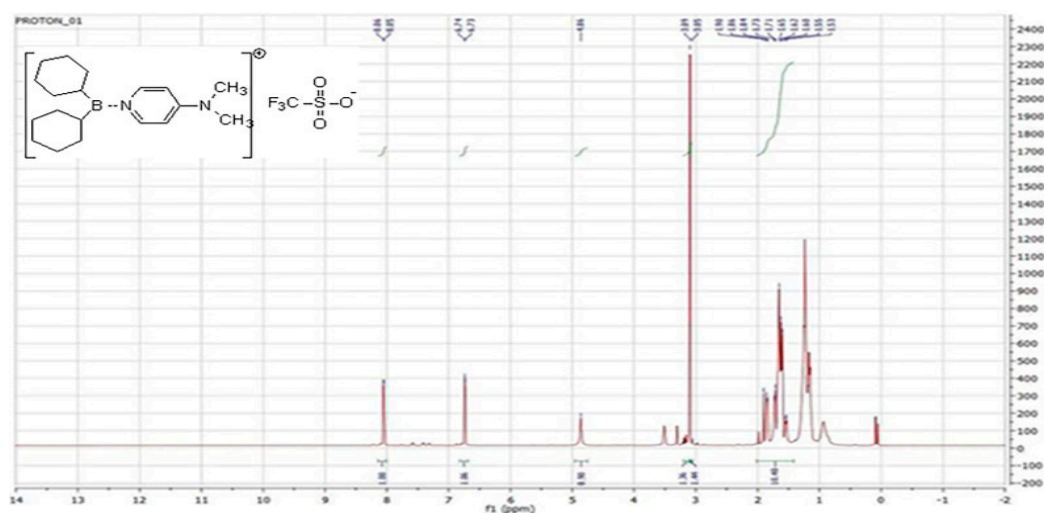

**Figure S2.** <sup>1</sup>H-NMR spectrum of dicyclohexyl borenium dimethyl amino pyridine trifluoro methane sulphonate (Borenium 1)

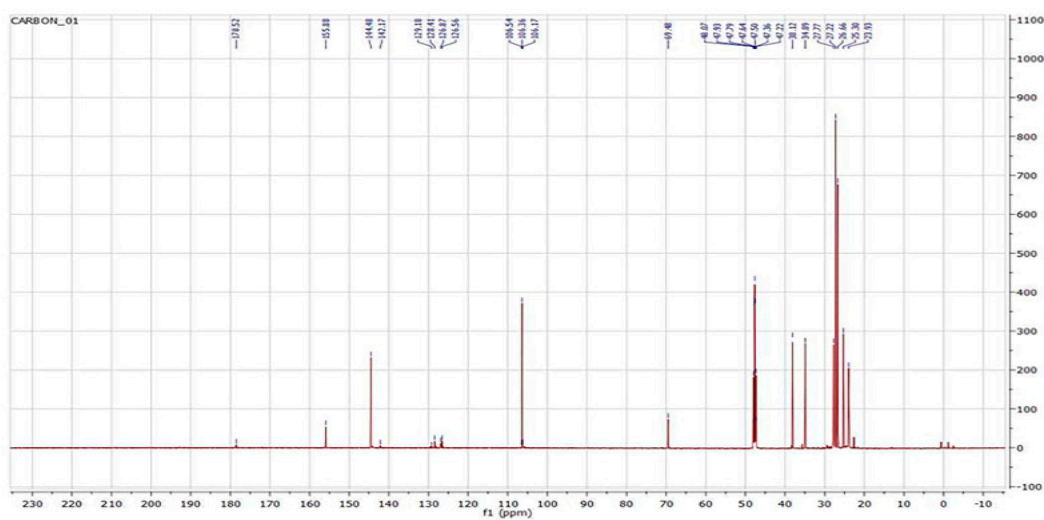

**Figure S3.** <sup>13</sup>C-NMR spectrum of dicyclohexyl borenium dimethyl amino pyridine trifluoro methane sulphonate (Borenium 1)

**Borenium 2:**  $^1\text{H}$  NMR (600 MHz,  $\text{CDCl}_3$ ):  $\delta$  8.18 (d,  $J=6.5$  Hz, 2H; CH aromatic pirydin), 6.71 (d,  $J=6.4$  Hz, 2H; CH aromatic pirydin), 3.98 (s, 1H; CH aliphatic), 3.22 (s, 6H;  $\text{CH}_3$  connect to nitrogen), 3.02 (d,  $J=7.5$  Hz, 2H;  $\text{CH}_2$  aliphatic), 1.68 (m, 1H; CH aliphatic), 1.55-0.94 (m, 20H;  $\text{CH}_2$  aliphatic), 0.93 (d,  $J=5.5$  Hz, 6H;  $\text{CH}_3$  aliphatic),  $^{13}\text{C}$  NMR (150 MHz,  $\text{CDCl}_3$ ): 175.5, 155.6, 154.9, 144.0, 129.6, 128.5, 126.3, 106.6, 77.2, 77.0, 53.8, 39.7, 24.8, 23.0. IR(cm): 3313 ( $-\text{NH}_2$ ), 3197 (C-H aromatic), 2915 (C-H aliphatic), 2841 (C-H aliphatic), 1697 (C=O), 1370 (C=C aromatic), 1232 (C-C aliphatic), 1055 (C-O).

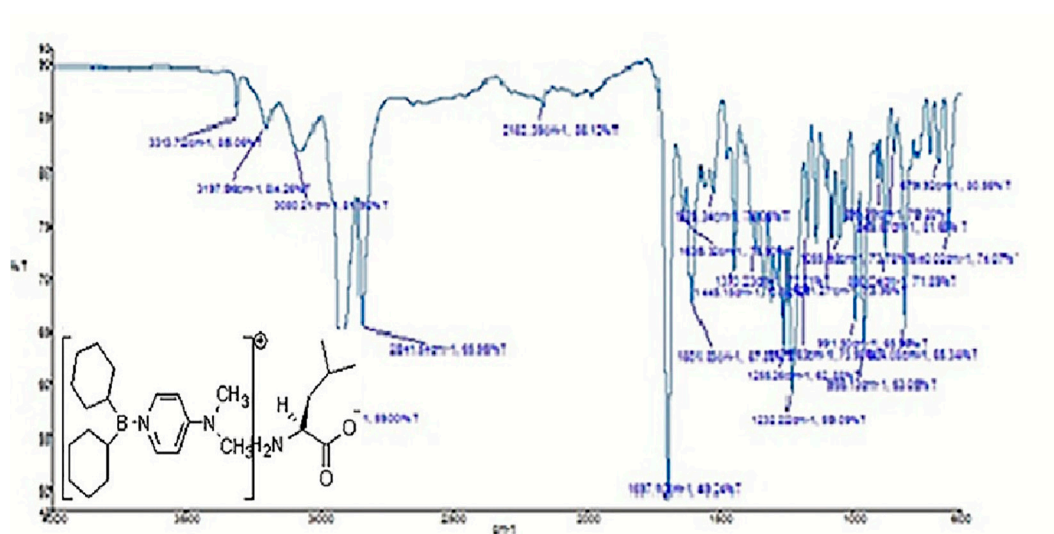

**Figure S4.** IR spectrum of dicyclohexyl borenium dimethyl amino pyridine 2-amino-4-methylpentanoate (Borenium 2)

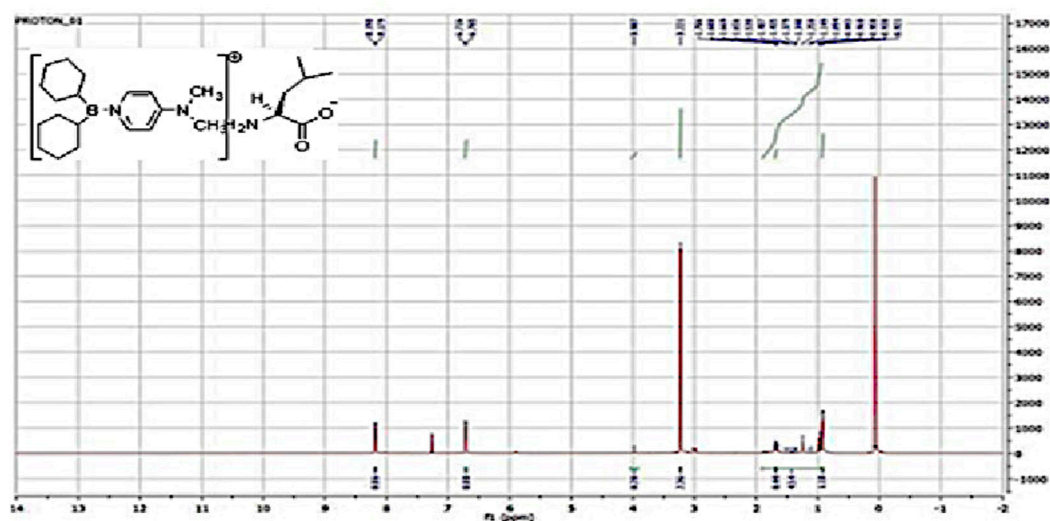

**Figure S5.** <sup>1</sup>H-NMR spectrum of dicyclohexyl borenium dimethyl amino pyridine 2-amino-4-methylpentanoate (Borenium 2)

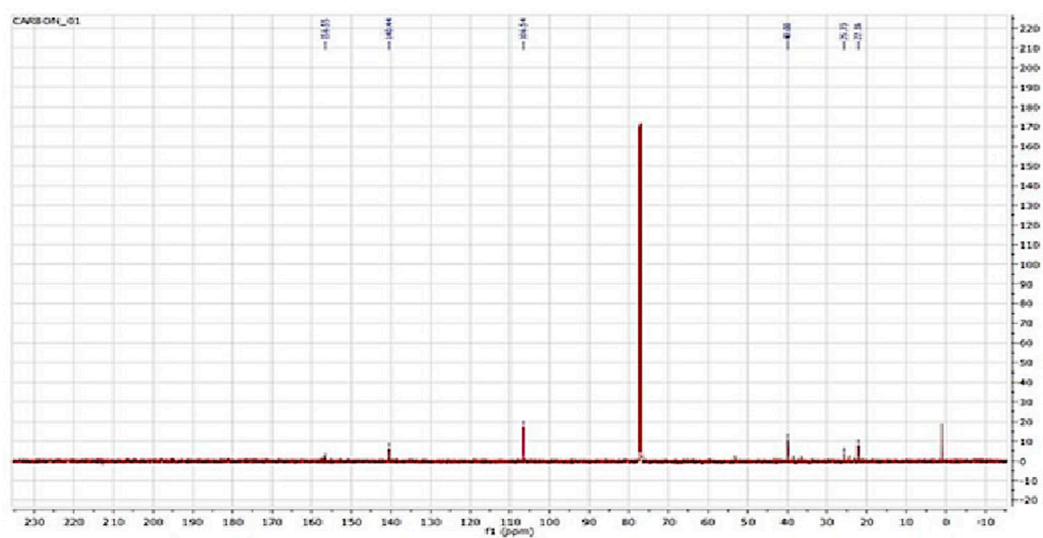

**Figure S6.** <sup>13</sup>C-NMR spectrum of dicyclohexyl borenium dimethyl amino pyridine 2-amino-4-methylpentanoate (Borenium 2)

**Borenium 3:**  $^1\text{H}$  NMR (600 MHz,  $\text{CD}_3\text{OD}$ ):  $\delta$  8.09 (d,  $J=6.9$  Hz, 2H; CH aromatic pyridin), 6.90 (d,  $J=6.7$  Hz, 2H; CH aromatic pyridin), 3.21 (s, 3H;  $\text{CH}_3$  connect to nitrogen), 3.19 (s, 3H;  $\text{CH}_3$  connect to nitrogen), 2.70 (s, 3H;  $\text{CH}_3$  connect to nitrogen), 2.68 (s, 3H;  $\text{CH}_3$  connect to nitrogen), 2.67 (s, 3H;  $\text{CH}_3$  connect to nitrogen).  $^{13}\text{C}$  NMR (150 MHz,  $\text{CD}_3\text{OD}$ ): 161.7, 157.0, 140.6, 119.6, 116.8, 115.4, 114.3, 106.6, 38.5, 33.9, 29.3, 24.0. IR(cm): 3067 (C-H aromatic), 2934 (C-H aliphatic), 1962 (C-H), 1641 (C=O), 1392 (C=C aromatic), 1207 (C-C aliphatic).

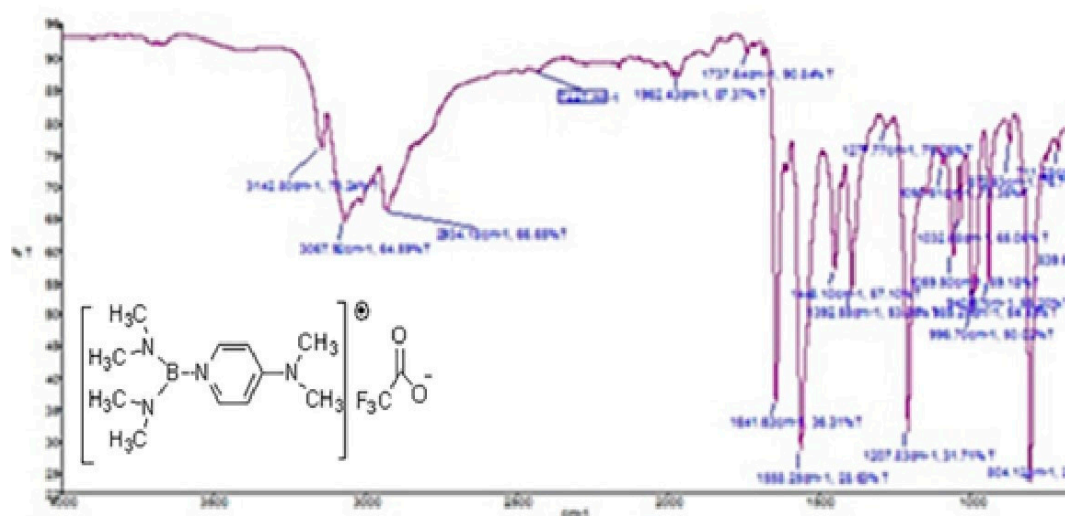

**Figure S7.** IR spectrum of bisdimethyl amino borenium dimethyl amino pyridine trifluoroacetate (Borenium 3)

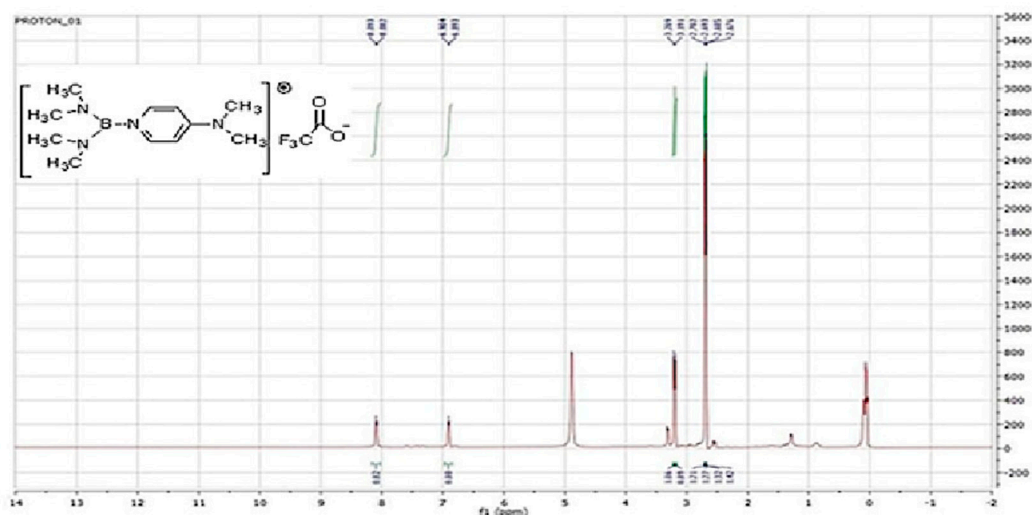

Borinium 4:  $^1\text{H}$  NMR (600 MHz,  $\text{CD}_3\text{OD}$ ):  $\delta$  3.60 (m, 2H; CH connect to boron), 1.86-1.27 (m, 20H;  $\text{CH}_2$  aliphatic).  $^{13}\text{C}$  NMR (150 MHz,  $\text{CD}_3\text{OD}$ ): 69.5, 56.9, 34.8, 34.1, 32.2, 25.2, 23.8. IR(cm): 2937 (C-H aliphatic), 2860 (C-H aliphatic), 1176 (-CH aliphatic).

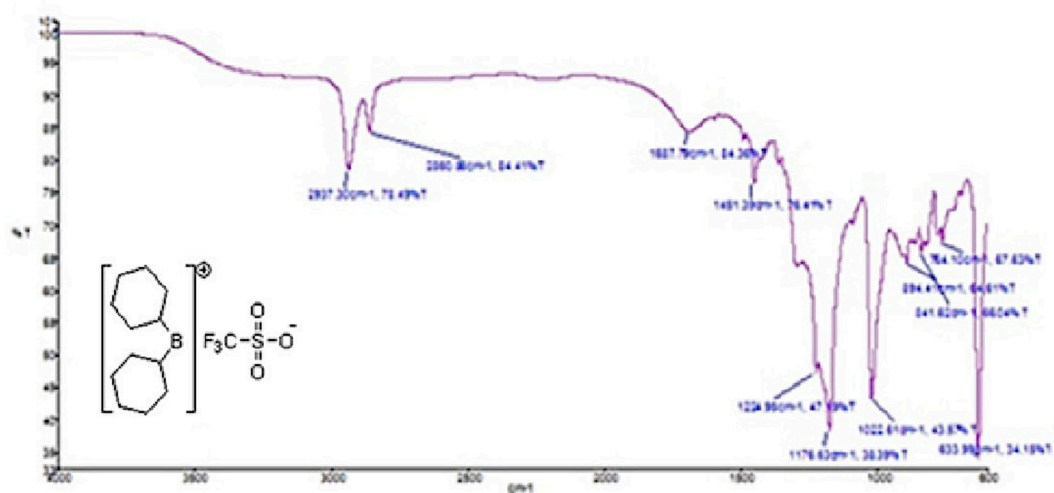

Figure S10. IR spectrum of dicyclohexyl borinium trifluoro methane sulphonate (Borinium 4)



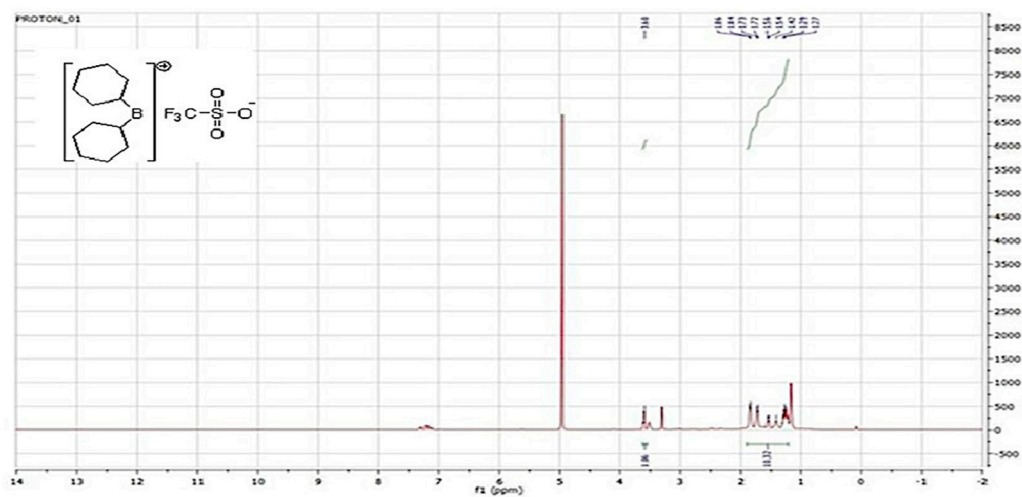

**Figure S11.** <sup>1</sup>H-NMR spectrum of dicyclohexyl borinium trifluoro methane sulphonate (Borinium 4)

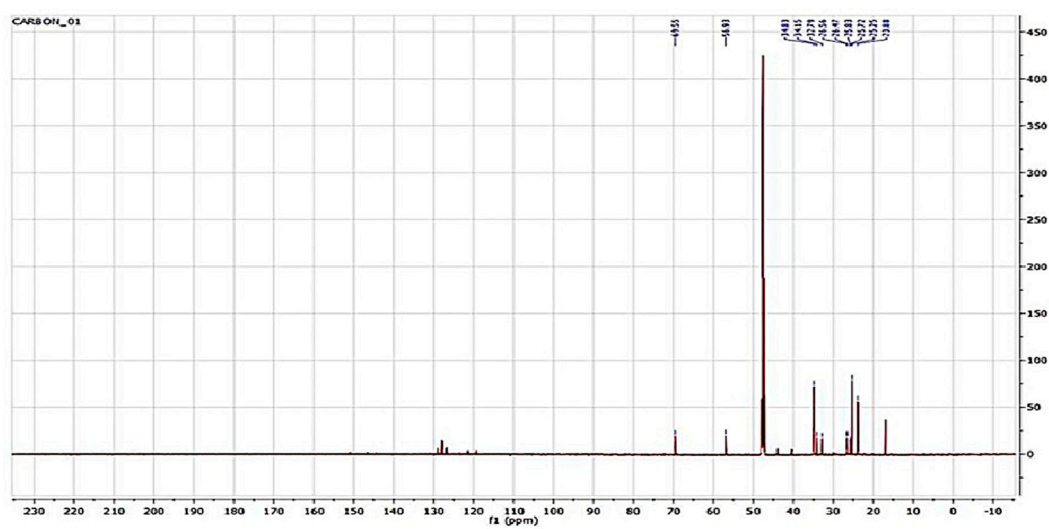

**Figure S12.** <sup>13</sup>C-NMR spectrum of dicyclohexyl borinium trifluoro methane sulphonate (Borinium 4)



**Borinium 5:**  $^1\text{H}$  NMR (600 MHz,  $\text{CD}_3\text{OD}$ ):  $\delta$  7.28 (s, 2H; CH aromatic), 7.10 (s, 2H; CH aromatic), 4.9 (s, 2H; BH2), 2.53 (s, 6H; CH3).  $^{13}\text{C}$  NMR (150 MHz,  $\text{CD}_3\text{OD}$ ):  $\delta$  145.6, 125.0, 116.8, 10.6, 10.5. **IR (cm):** 3871, 3091, 3055, 2931, 2429, 2127, 1583, 1420.

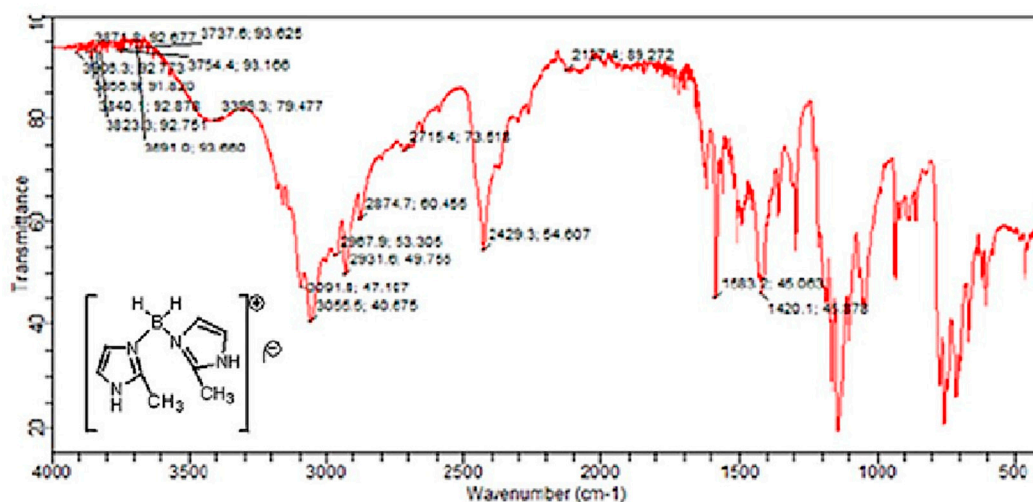

**Figure S13.** IR spectrum of Bis (2-methyl-1H-imidazol-3-yl) dihydroboronium iodide (Borinium 5)

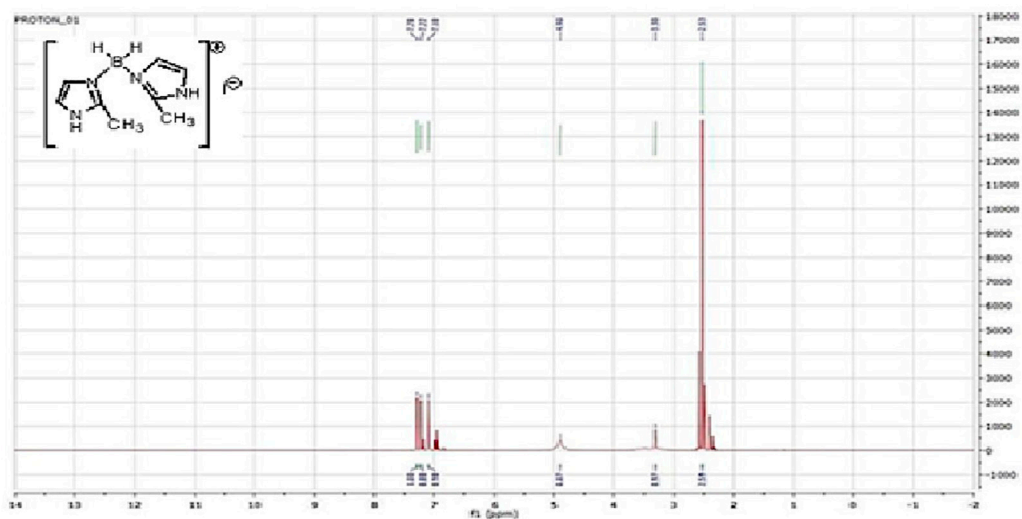

**Figure S14.**  $^1\text{H}$ -NMR spectrum of Bis (2-methyl-1H-imidazol-3-yl) dihydroboronium iodide (Borinium 5)

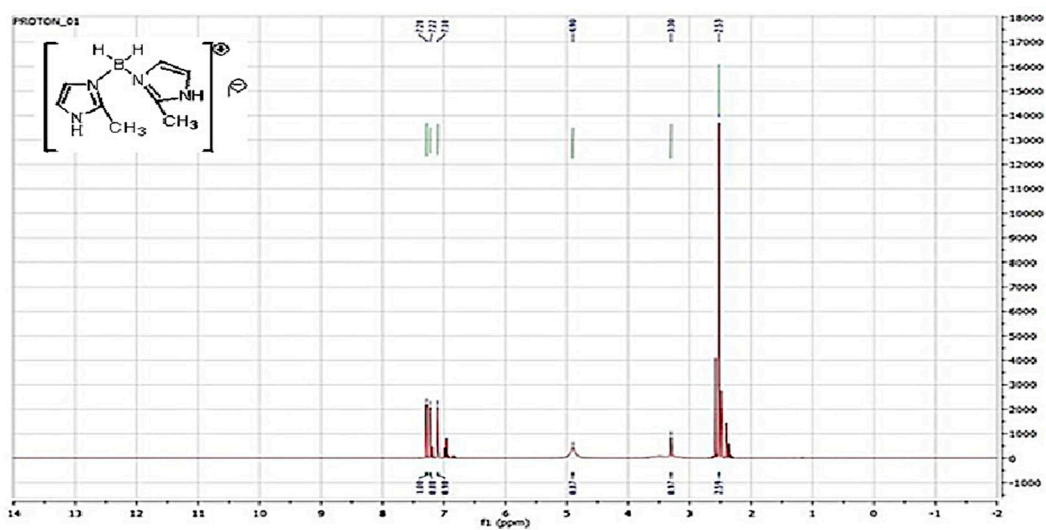

**Figure S15.**  $^{13}\text{C}$ -NMR spectrum of bis(1,2-dimethyl-1H-imidazol-3-yl) dihydroboronium iodide (Borinium 5)

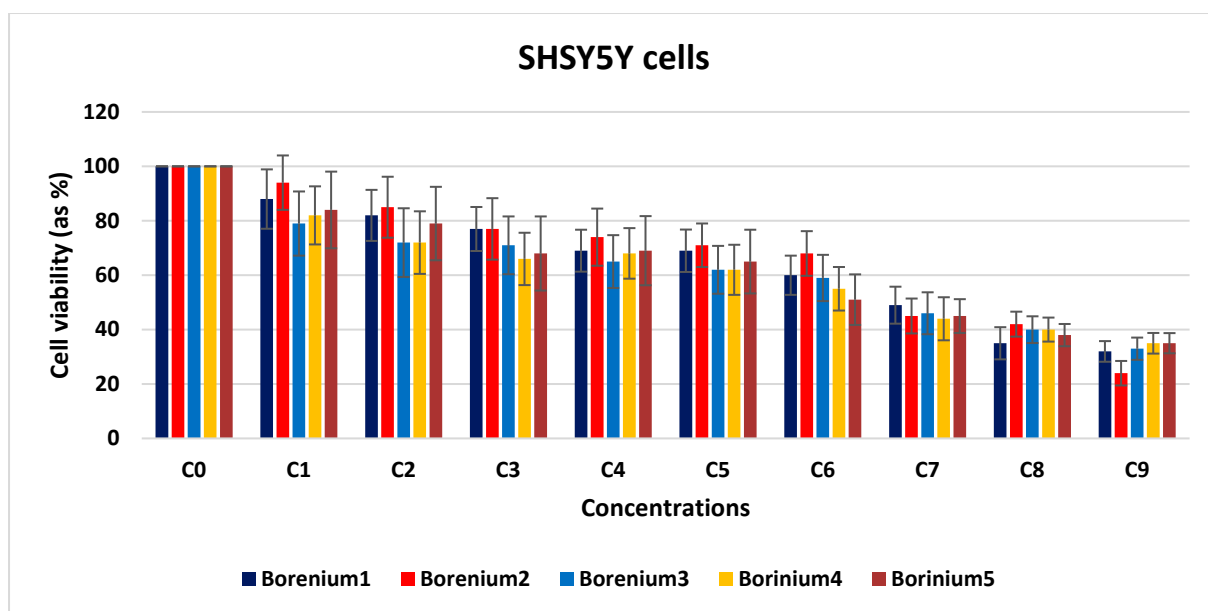

Fig S16. Cytotoxic activity of compounds in SHSY-5Y cells

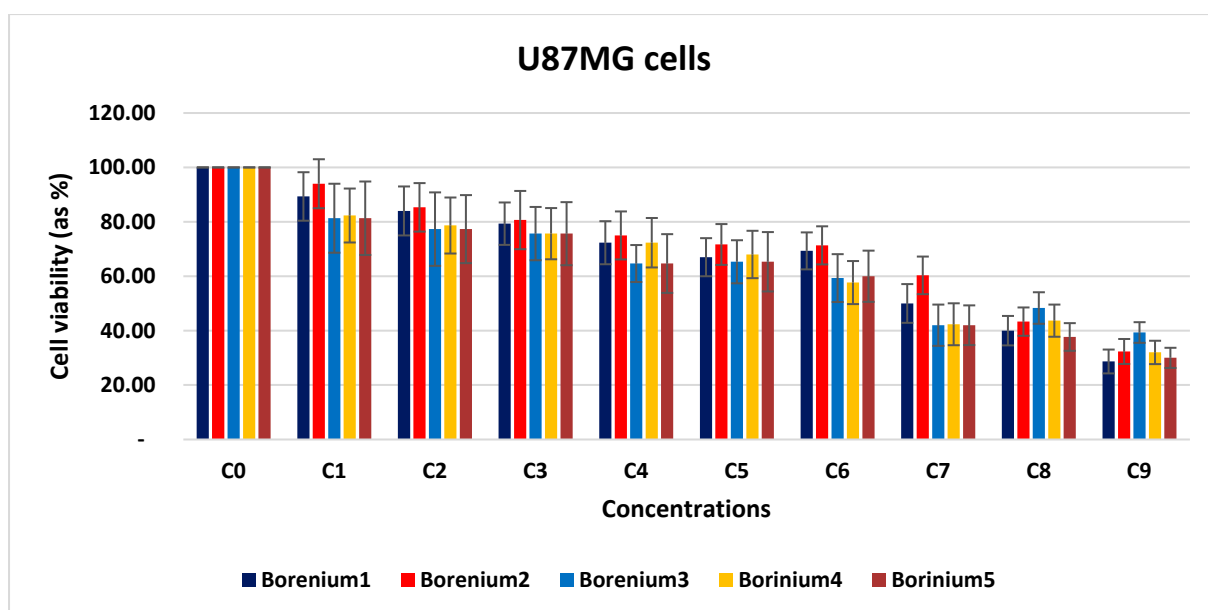

Fig S17. Cytotoxic activity of compounds in U87MG cells

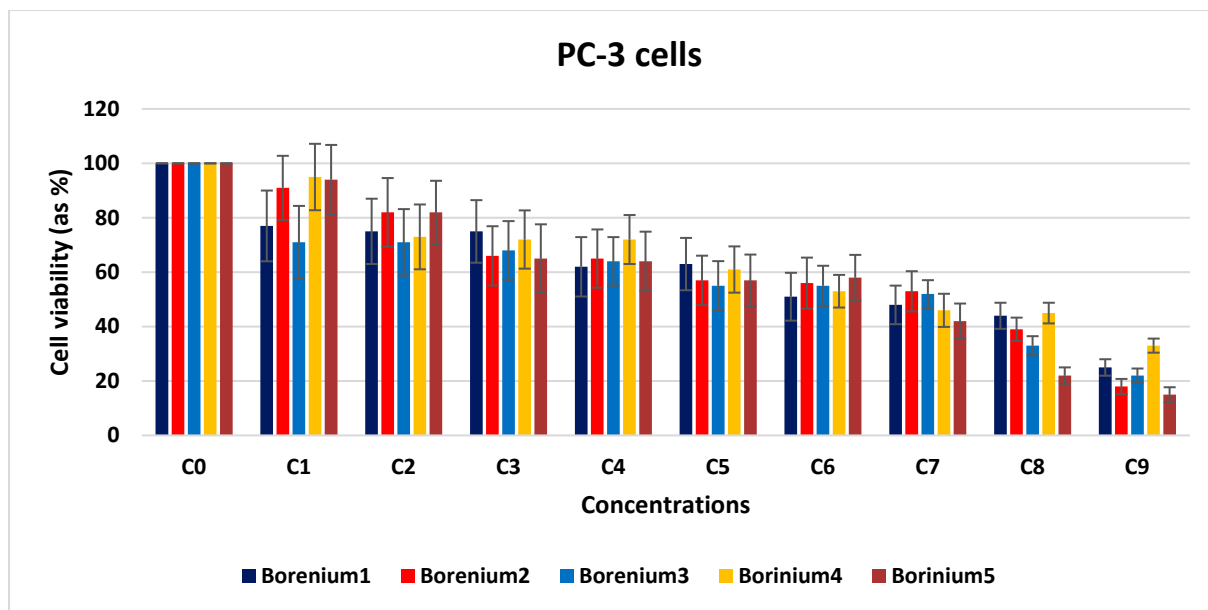

Fig S18. Cytotoxic activity of compounds in PC-3 cells

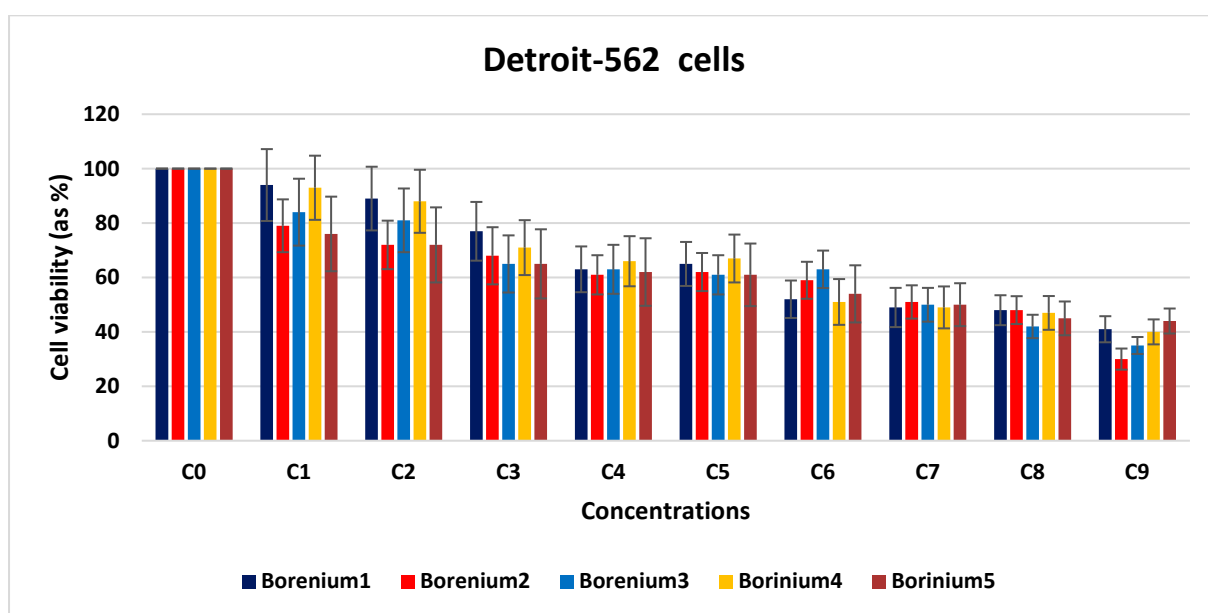

Fig S19. Cytotoxic activity of compounds in Detroit-562 cells

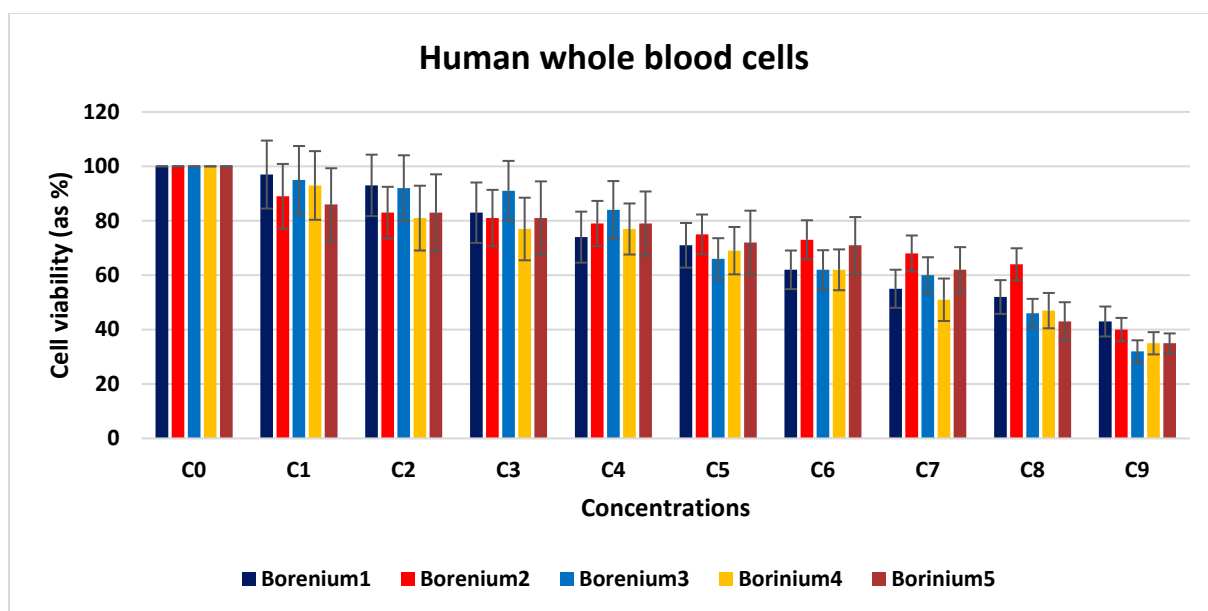

**Fig S20.** Cytotoxic activity of compounds in cultured human whole blood cells
